# Supplementary material for: Quantification of Zonisamide in Dried Blood Spots and Dried Plasma Spots by UPLC–MS/MS: Application to Clinical Practice
Source: MDPI journal article supplement (doi:10.3390/molecules27154899), 2022-07-31
Supplement: s1 [file s1]

Table S1. Stability testing.

|                                  |           | DPS    |         | DBS    |         |
|----------------------------------|-----------|--------|---------|--------|---------|
|                                  |           | low QC | high QC | low QC | high QC |
| nominal concentration,<br>µg/ mL |           | 0.750  | 38.0    | 0.375  | 19.0    |
| short term stability             | <bias>, % | -1.42  | -4.75   | 7.06   | 3.77    |
|                                  | RSD, %    | 2.52   | 3.53    | 1.12   | 7.10    |
| long term stability              | <bias>, % | 7.78   | 4.31    | 8.65   | 7.01    |
|                                  | RSD, %    | 3.12   | 3.94    | 3.58   | 4.11    |
| auto sampler<br>stability        | <bias>, % | 7.59   | 7.23    | 2.13   | 3.11    |
|                                  | RSD, %    | 4.89   | 5.73    | 2.36   | 5.05    |
| n                                |           | 3      | 3       | 3      | 3       |

<bias> - percentage bias presents deviation of mean ZNS concentration determined at certain QC level after applied storage conditions from the nominal concentration; ((mean ZNS concentration – nominal concentration)/nominal concentration) × 100; calculated value should be ± 15%; RSD – percentage coefficient of variation for calculated bias at certain QC level; n – number of replication at certain QC level.

## Analytical Greenness report sheet

25/07/2022 00:16:20

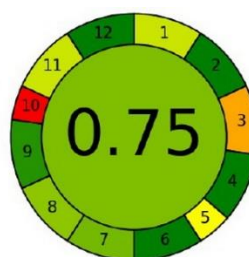

| Criteria                                                                                                                             | Score | Weight |
|--------------------------------------------------------------------------------------------------------------------------------------|-------|--------|
| 1. Direct analytical techniques should be applied to avoid sample treatment.                                                         | 0.6   | 2      |
| 2. Minimal sample size and minimal number of samples are goals.                                                                      | 1.0   | 2      |
| 3. If possible, measurements should be performed in situ.                                                                            | 0.33  | 2      |
| 4. Integration of analytical processes and operations saves energy and reduces the use of reagents.                                  | 1.0   | 2      |
| 5. Automated and miniaturized methods should be selected.                                                                            | 0.5   | 1      |
| 6. Derivatization should be avoided.                                                                                                 | 1.0   | 2      |
| 7. Generation of a large volume of analytical waste should be avoided, and proper management of analytical waste should be provided. | 0.77  | 2      |
| 8. Multi-analyte or multi-parameter methods are preferred versus methods using one analyte at a time.                                | 0.72  | 2      |
| 9. The use of energy should be minimized.                                                                                            | 0.93  | 2      |
| 10. Reagents obtained from renewable sources should be preferred.                                                                    | 0.0   | 1      |
| 11. Toxic reagents should be eliminated or replaced.                                                                                 | 0.6   | 2      |
| 12. Operator's safety should be increased.                                                                                           | 1.0   | 2      |

**Figure S1.** Greenness of the proposed UHPLC-MS/MS method - Analytical greenness report with overall green Scheme 12. principles of the Green Analytical Chemistry.
